# Supplementary material
Source: Research Square preprint supplement (doi:10.21203/rs.3.rs-9674827/v1)
Supplement: Supplementary file 1 [file 51e832a764756d8d548e29df.docx]

SupplementaryTable 1 Locations and years of samples collection.

| **No** | **Locations** | **Province** | **Ethnic Groups** | **Year** | **Total Subjects** | **Study** |
| --- | --- | --- | --- | --- | --- | --- |
| 1 | Makassar, Toraja | South Sulawesi | Makassarese, Buginese, Torajan | 1995-1996 | 1075 | Population |
| 2 | Palembang (Ogan Komering Ilir) | South Sumatra | Palembang Malay | 1999 | 500 | Population |
| 3 | Jepara | Central Java | Javanese | 2000 | 185 | Population |
| 4 | Makassar | South Sulawesi | Makassarese, Mandarese, Buginese, Torajan, Kajang | 2000 | 787 | Population |
| 5 | North Sumatra (Berastagi) | North Sumatra | Batak Karo, Batak Toba | 2001 | 332 | Population |
| 6 | Sumba (Kodi, Waingapu) | East Nusa Tenggara | Kodinese, Sumbanese | 2003 | 193 | Population |
| 7 | Larantuka | East Nusa Tenggara | Larantuka | 2004 | 72 | Population |
| 8 | Takengon | Aceh | Gayonese | 2011 | 220 | Population |
| 9 | Ternate (Maba) | North Maluku | Maba, Makian | 2012 | 389 | Population |
| 10 | Banjarmasin | South Kalimantan | Banjarese, Dayak Tribes | 2012 | 201 | Population |
| 11 | Panenggo Ede | East Nusa Tenggara | Kodinese | 2014 | 610 | Population |
| 12 | Bukit Suban | Jambi | Anak Dalam Tribe | 2015 | 35 | Population |
| 13 | Alor | East Nusa Tenggara | Alorese | 2004 | 5 | IGDP |
| 14 | Bali | Bali | Balinese | - | 1 | IGDP |
| 15 | Bena, Bere, Cibal, Rampasasa | East Nusa Tenggara | Bena, Bere, Cibal, Rampasasa | 2005 | 45 | IGDP |
| 16 | Dieng | Central Java | Javanese | 2005 | 6 | IGDP |
| 17 | Tamiang Layang | Central Kalimantan | Dayak Maanyan | 2013 | 7 | IGDP |
| 18 | Waur, Faan, Ohoidertutu | Maluku | Kei | 2015 | 6 | IGDP |
| 19 | Lembata, Waipukang | East Nusa Tenggara | Lembata, Waipukang | 2005 | 7 | IGDP |
| 20 | Madobag, Pasakiat Taileleu | West Sumatra | Mentawaian | 2005, 2016 | 36 | IGDP |
| 21 | Nias | North Sumatra | Nias | 2005 | 15 | IGDP |
| 22 | South Sulawesi | South Sulawesi | Mandarese | - | 6 | IGDP |
| 23 | Sarolangun, Tebo | Jambi | Anak Dalam Tribe | 2015 | 4 | IGDP |
| 24 | Toba | North Sumatra | Batak Toba | - | 7 | IGDP |
| 25 | Wunga, Anakalang | East Nusa Tenggara | Anakalang, Wunga | 2016 | 29 | IGDP |
| 26 | Sangliat Dol, Romean, Tumbur | Maluku | Tanimbarese, Yamdena, Makatian | 2015 | 6 | IGDP |

IGDP: Indonesian Genome Diversity Project

Supplementary Table 2 Thalassemia Type and Mutation Frequencies by Ethnic Groups.

| **Province** | **Location** | **Ethnic Groups** | **Thalassemia type** | **Mutations** | **N (%)** |
| --- | --- | --- | --- | --- | --- |
| Aceh | Takengon | Gayonese | Alpha | 3.7 del. (het) | 11 (5%) |
| Takengon | Gayonese | Alpha | 4.2 del. (het) | 1 (0.45%) |
| Takengon | Gayonese | Beta | HbE (het) | 6 (2.73%) |
| Takengon | Gayonese | Beta | IVS1-nt1 (het) | 3 (1.36%) |
| Takengon | Gayonese | Beta | IVS1-nt5 (het) | 1 (0.45%) |
| North Sumatra | Berastagi | Batak Toba | Alpha | 3.7 del. (het) | 2 (0.56%) |
| Berastagi | Batak Karo | Alpha | 3.7 del. (het) | 1 (0.28%) |
| Berastagi | Batak Karo | Alpha | 4.2 del. (het) | 1 (0.28%) |
| Berastagi | Nias | Alpha | 4.2 del. (het) | 1 (0.28%) |
| Berastagi | Batak Toba | Beta | Hb Malay (het) | 1 (0.28%) |
| Berastagi | Batak Toba | Beta | HbD LA (Cd121) | 2 (0.56%) |
| Berastagi | Batak Toba | Beta | Malay's Poly A | 1 (0.28%) |
| Berastagi | Batak Karo | Beta | Hb Malay (het) | 2 (0.56%) |
| Nias | Nias | Beta | IVS1-nt5 (het) | 1 (0.28%) |
| South Sumatra | Ogan Komering Ilir | Palembang Malay | Alpha | 3.7 del. (het) | 8 (1.6%) |
| Ogan Komering Ilir | Palembang Malay | Alpha | 3.7 del., 4.2 del | 1 (0.2%) |
| Ogan Komering Ilir | Palembang Malay | Alpha | 4.2 del. (het) | 2 (0.4%) |
| Ogan Komering Ilir | Palembang Malay | Alpha | HbCS | 2 (0.4%) |
| Ogan Komering Ilir | Palembang Malay | Beta | Cd 41-42 | 1 (0.2%) |
| Ogan Komering Ilir | Palembang Malay | Beta | Hb Malay (het) | 16 (3.2%) |
| Ogan Komering Ilir | Palembang Malay | Beta | HbE (het) | 19 (3.8%) |
| Ogan Komering Ilir | Palembang Malay | Beta | IVS1-nt5 | 2 (0.4%) |
| Ogan Komering Ilir | Palembang Malay | Beta | IVS1-nt5 (het) | 2 (0.4%) |
| Ogan Komering Ilir | Palembang Malay | Beta | Malay's Poly A | 1 (0.2%) |
| Central Java | Jepara | Javanese | Alpha | 4.2 del. (het) | 1 (0.52%) |
| Jepara | Javanese | Beta | HbE (het) | 8 (4.19%) |
| South Kalimantan | Banjarmasin | Banjarese | Alpha | 3.7 del. (het) | 1 (0.5%) |
| Banjarmasin | Banjarese | Alpha | 3.7 del. (het) | 4 (1.99%) |
| Banjarmasin | Dayak Deyah | Alpha | 3.7 del. (het) | 1 (0.5%) |
| Banjarmasin | Dayak Ngaju | Alpha | 3.7 del. (het) | 1 (0.5%) |
| Banjarmasin | Banjarese | Beta | HbE (het) | 1 (0.5%) |
| Banjarmasin | Banjarese | Beta | Malay's Poly A | 1 (0.5%) |
| Banjarmasin | Banjarese | Beta | HbE (het) | 2 (1%) |
| Banjarmasin | Banjarese | Beta | IVS1-nt5 (het) | 2 (1%) |
| Banjarmasin | Dayak | Beta | HbE (het) | 1 (0.5%) |
| South Sulawesi | Makassar | Buginese | Alpha | 3.7 del. (het) | 2 (0.11%) |
| Makassar | Buginese | Alpha | HbO | 8 (0.43%) |
| Makassar | Kajang | Alpha | 3.7 del. (het) | 7 (0.37%) |
| Makassar | Kajang | Alpha | HbO | 3 (0.16%) |
| Makassar | Makassarese | Alpha | 3.7 del. (het) | 8 (0.43%) |
| Makassar | Makassarese | Alpha | 4.2 del. (het) | 1 (0.05%) |
| Makassar | Makassarese | Alpha | HbO | 3 (0.16%) |
| Makassar | Mandarese | Alpha | 3.7 del. (het) | 7 (0.37%) |
| Makassar | Mandarese | Alpha | 4.2 del. (het) | 1 (0.05%) |
| Makassar | Torajan | Alpha | 3.7 del. (het) | 2 (0.11%) |
| Makassar | Torajan | Alpha | HbO | 20 (1.07%) |
| Makassar | Buginese | Beta | Cd-35 (del C) | 1 (0.05%) |
| Makassar | Buginese | Beta | Hb Lepore | 1 (0.05%) |
| Makassar | Buginese | Beta | HbE (het) | 25 (1.34%) |
| Makassar | Buginese | Beta | Malay's Poly A | 1 (0.05%) |
| Makassar | Makassarese | Beta | HbE (het) | 16 (0.86%) |
| Makassar | Mandarese | Beta | HbE (het) | 1 (0.05%) |
| Makassar | Torajan | Beta | Filipino del. | 3 (0.16%) |
| Makassar | Torajan | Beta | HbE (het) | 2 (0.11%) |
| East Nusa Tenggara | Anakalang | Anakalang | Beta | HbE (het) | 4 (0.42%) |
| Anakalang | Anakalang | Beta | HbE (het), 3-UNT(A>G) (het) | 1 (0.1%) |
| Bena | Bena | Beta | HbE (het) | 1 (0.1%) |
| Cibal | Cibal | Beta | 3-UNT(A>G) (het) | 1 (0.1%) |
| Kodi | Ende | Alpha | 3.7 del. (het) | 1 (0.1%) |
| Kodi | Kodinese | Alpha | 3.7 del. (het) | 15 (1.56%) |
| Kodi | Kodinese | Alpha | 3.7 del. (homo) | 2 (0.21%) |
| Kodi | Kodinese | Alpha | 3.7 del., 4.2 del | 2 (0.21%) |
| Kodi | Kodinese | Alpha | 4.2 del. (het) | 3 (0.31%) |
| Kodi | Kodinese | Beta | HbE (het) | 18 (1.87%) |
| Lembata | Lembata | Beta | 3-UNT(A>G) (het) | 1 (0.1%) |
| Panenggo Ede | Indonesia | Alpha | 3.7 del. (homo) | 3 (0.31%) |
| Panenggo Ede | Indonesia | Alpha | 4.2 del. (homo) | 1 (0.1%) |
| Panenggo Ede | Kodinese | Alpha | 3.7 del. (homo) | 48 (4.99%) |
| Panenggo Ede | Kodinese | Alpha | 4.2 del. (homo) | 15 (1.56%) |
| Panenggo Ede | Kodinese | Alpha | SEA (het) | 26 (2.71%) |
| Panenggo Ede | Indonesia | Beta | HbE (het) | 4 (0.42%) |
| Panenggo Ede | Kodinese | Beta | HbE (het) | 97 (10.09%) |
| Rampasasa | Rampasasa | Beta | 3-UNT(A>G) (het) | 2 (0.21%) |
| Waingapu | East Sumbanese | Alpha | 3.7 del. (het) | 25 (2.6%) |
| Waingapu | East Sumbanese | Alpha | 3.7 del. (homo) | 5 (0.52%) |
| Waingapu | East Sumbanese | Alpha | 3.7 del., 4.2 del | 1 (0.1%) |
| Waingapu | East Sumbanese | Alpha | 4.2 del. (het) | 2 (0.21%) |
| Waingapu | East Sumbanese | Alpha | 4.2 del. (homo) | 4 (0.42%) |
| Waingapu | East Sumbanese | Alpha-Beta | 3.7 del. (het); HbE (het) | 1 (0.1%) |
| Waingapu | Javanese | Beta | HbE (het) | 1 (0.1%) |
| Waingapu | West Sumbanese | Beta | HbE (het) | 1 (0.1%) |
| Waingapu | East Sumbanese | Beta | HbE (het) | 37 (3.85%) |
| Waingapu | Unknown | Beta | HbE (het) | 1 (0.1%) |
| Wunga | Wunga | Beta | HbE (het) | 5 (0.52%) |
| North Maluku | Maba | Galela | Alpha | 3.7 del. (het) | 3 (0.77%) |
| Maba | Galela | Alpha | 4.2 del. (het) | 1 (0.26%) |
| Maba | Galela-Tobelo | Alpha | 3.7 del. (het) | 1 (0.26%) |
| Maba | Gorap | Alpha | 3.7 del. (het) | 1 (0.26%) |
| Maba | Ibu | Alpha | 4.2 del. (het) | 1 (0.26%) |
| Maba | Jailolo | Alpha | 3.7 del. (het) | 1 (0.26%) |
| Maba | Kao | Alpha | 3.7 del. (het) | 1 (0.26%) |
| Maba | Kayoa | Alpha | 3.7 del. (het) | 3 (0.77%) |
| Maba | Kayoa | Alpha | 4.2 del. (het) | 2 (0.51%) |
| Maba | Loloda | Alpha | 3.7 del. (het) | 1 (0.26%) |
| Maba | Maba | Alpha | 3.7 del. (het) | 5 (1.29%) |
| Maba | Maba Pura | Alpha | 3.7 del. (het) | 1 (0.26%) |
| Maba | Maba Soagimalaha | Alpha | 3.7 del. (het) | 1 (0.26%) |
| Maba | Maba Soagimalaha | Alpha | 4.2 del. (het) | 1 (0.26%) |
| Maba | Makian | Alpha | 3.7 del. (het) | 5 (1.29%) |
| Maba | Makian | Alpha | 3.7 del. (homo) | 1 (0.26%) |
| Maba | Makian | Alpha | 4.2 del. (het) | 6 (1.54%) |
| Maba | Malut | Alpha | 3.7 del. (het) | 1 (0.26%) |
| Maba | Moti-Tidore | Alpha | 3.7 del. (het) | 1 (0.26%) |
| Maba | Patani | Alpha | 3.7 del. (het) | 2 (0.51%) |
| Maba | Sanana | Alpha | 3.7 del. (het) | 4 (1.03%) |
| Maba | Sanana | Alpha | 4.2 del. (het) | 2 (0.51%) |
| Maba | Sawai | Alpha | 3.7 del. (het) | 1 (0.26%) |
| Maba | Sula | Alpha | 3.7 del. (het) | 1 (0.26%) |
| Maba | Sula | Alpha | 4.2 del. (het) | 1 (0.26%) |
| Maba | Ternate | Alpha | 3.7 del. (het) | 6 (1.54%) |
| Maba | Ternate | Alpha | 4.2 del. (het) | 1 (0.26%) |
| Maba | Tidore | Alpha | 3.7 del. (het) | 9 (2.31%) |
| Maba | Tidore | Alpha | 3.7 del. (homo) | 1 (0.26%) |
| Maba | Tidore | Alpha | 4.2 del. (het) | 4 (1.03%) |
| Maba | Tobelo | Alpha | 4.2 del. (het) | 1 (0.26%) |
| Maba | Unknown | Alpha | 4.2 del. (het) | 1 (0.26%) |
| Maba | Weda | Alpha | 3.7 del. (het) | 1 (0.26%) |
| Maba | West Makian | Beta | HbE (het) | 1 (0.26%) |
| Maba | Sanana | Beta | HbE (het) | 2 (0.51%) |
| Maba | Tidore | Beta | Cd-39 | 1 (0.26%) |
| Maba | Tidore | Beta | HbE (het) | 1 (0.26%) |
| Maba | Tobelo | Beta | HbE (het) | 1 (0.26%) |

del.: deletion, het: heterozygous, homo: homozygous. Hb Lepore: is a beta- and delta-fusion mutation involving the beta- and delta-globin genes, clinically classified within the beta-thalassemia group. This table excludes the no pathogenic mutation group.
